# Supplementary material
Source: MDPI journal article supplement (https://www.mdpi.com/2073-4395/13/12/3073)
Supplement: s1 [file s1]

**Table S1.** Basic diets composition and nutrition levels of mid-late lactation cows.

1

| Items                                 | Content |
|---------------------------------------|---------|
| Ingredients (%DM)                     |         |
| Oat hay                               | 2.6     |
| Alfalfa hay                           | 3.3     |
| Alfalfa silage                        | 8.3     |
| Corn silage                           | 41.0    |
| Steam-flake corn                      | 11.0    |
| Corn grain                            | 5.0     |
| Fat powder                            | 0.5     |
| Rumen culture                         | 0.3     |
| Premix concentrate                    | 2.3     |
| Baking soda                           | 0.4     |
| Slow-release urea                     | 0.3     |
| Soybean meal                          | 8.3     |
| Soybean hulls                         | 3.2     |
| Dry distiller's grain protein extract | 4.7     |
| Spray corn husk                       | 3.0     |
| Cotton seed meal                      | 3.0     |
| Molasses                              | 2.8     |
| Chemical composition                  |         |
| MEb, MJ/kg                            | 6.5     |
| Crude protein, % of DM                | 17      |
| Either extract , % of DM              | 3.4     |
| Neutral detergent fiber, % of DM      | 32.0    |
| Acid detergent fiber, % of DM         | 21.0    |
| Ca, % of DM                           | 0.5     |
| P, % of DM                            | 0.35    |

Abbreviations: DM, dry matter; ME, metabolizable energy

2

1 Formulated to contain (per kilogram of premix concentrate); 90 g of NaCl; 30 g of MgO<sub>2</sub>; 30 mg of Se; 15 mg of Co; 385 mg of Cu; 60 mg of Fe; 1000 mg of Mn; 50 mg of I; 2600 mg of Zn; 730,000 IU of vitamin A; 1750,000 IU of vitamin D; 500 IU of vitamin E.

3

4

5

2 Calculated based on Ministry of Agriculture of P. R. China recommendation<sup>[1]</sup>

6

[1] MOA (Ministry of Agriculture of P.R. China). 2004. Feeding Standard of beef Cattle (NY/T 815–2004). MOA, Beijing, China

7

8

9

10
